# Supplementary material for: p-Hydroxybenzoic Acid Ameliorates Colitis by Improving the Mucosal Barrier in a Gut Microbiota-Dependent Manner
Source: MDPI journal article supplement (doi:10.3390/nu14245383), 2022-12-18
Supplement: s1 [file s1]

Supplementary Table S1. The composition of the standard chow diet (per kg).

| <b>Vitamin</b>           |      | <b>Mineral</b>                     |            |
|--------------------------|------|------------------------------------|------------|
| Vitamin A (IU)           | 7800 | Na (g)                             | 3.1        |
| Vitamin D (IU)           | 1200 | Mg (g)                             | 2.9        |
| Vitamin E (mg)           | 67   | K (g)                              | 7.4        |
| Vitamin K (mg)           | 5    | Cu (mg)                            | 11.4       |
| Vitamin B1 (mg)          | 10   | Fe (mg)                            | 113.7      |
| Vitamin B2 (mg)          | 15   | Mn (mg)                            | 80         |
| Vitamin B6 (mg)          | 10   | Zn (mg)                            | 31.6       |
| Vitamin B12 (mg)         | 0.02 | Se (mg)                            | 0.2        |
| Niacin (mg)              | 55   | I (mg)                             | 0.7        |
| Pantothenic acid (mg)    | 22   | <b>Proportion of energy supply</b> |            |
| Biotin (mg)              | 0.2  | Protein                            | 23.07%     |
| Choline (mg)             | 1250 | Fat                                | 11.85%     |
| Folic acid (mg)          | 6.6  | Carbohydrate                       | 65.08%     |
| <b>Amino acid (g)</b>    |      | Total                              | 3.4 kcal/g |
| Methionine + Cystine     | 5.8  |                                    |            |
| Lysine                   | 8.9  |                                    |            |
| Tryptophan               | 2.1  |                                    |            |
| Arginine                 | 9.9  |                                    |            |
| Leucine                  | 14.8 |                                    |            |
| Isoleucine               | 7.4  |                                    |            |
| Threonine                | 6.6  |                                    |            |
| Valine                   | 8.9  |                                    |            |
| Histidine                | 4.9  |                                    |            |
| Phenylalanine + tyrosine | 14.6 |                                    |            |

Supplementary Table S2. Primers sequences.

|                | Forward Primer          | Reverse Primer           |
|----------------|-------------------------|--------------------------|
| $\beta$ -Actin | GTGACGTTGACATCCGTAAAGA  | GCCGGACTCATCGTACTCC      |
| Muc1           | GGCATTCTGGGCTCCTTTCTT   | TGGAGTGGTAGTCGATGCTAAG   |
| Muc2           | ATGCCACCTCCTCAAAGAC     | GTAGTTTCCGTTGGAACAGTGAA  |
| Muc3           | CCGAGAGCGGAAGTGTGTG     | TGTAAGTGTGGTTTTTGGTCTTCA |
| Zo-1           | GCCGCTAAGAGCACAGCAA     | GCCCTCCTTTTAACACATCAGA   |
| Occludin       | TGAAAGTCCACCTCCTTACAGA  | CCGGATAAAAAGAGTACGCTGG   |
| Claudin        | TGCCCCAGTGGAAGATTTACT   | CTTTGCGAAACGCAGGACAT     |
| Tnfa           | CAGGCGGTGCCTATGTCTC     | CGATCACCCCGAAGTTCAGTAG   |
| Il1 $\beta$    | GAAATGCCACCTTTTGACAGTG  | TGGATGCTCTCATCAGGACAG    |
| Il10           | CTTACTGACTGGCATGAGGATCA | GCAGCTCTAGGAGCATGTGG     |
| Cxcl1          | ACTGCACCCAAACCGAAGTC    | TGGGGACACCTTTTAGCATCTT   |
| Il17a          | TCAGCGTGTCCAAACACTGAG   | CGCCAAGGGAGTTAAAGACTT    |
| IL4            | GGTCTCAACCCCCAGCTAGT    | GCCGATGATCTCTCTCAAGTGAT  |
| IL6            | CTGCAAGAGACTTCCATCCAG   | AGTGGTATAGACAGGTCTGTTGG  |
| Mcp1           | TAAAAACCTGGATCGGAACCAA  | GCATTAGCTTCAGATTTACGGGT  |

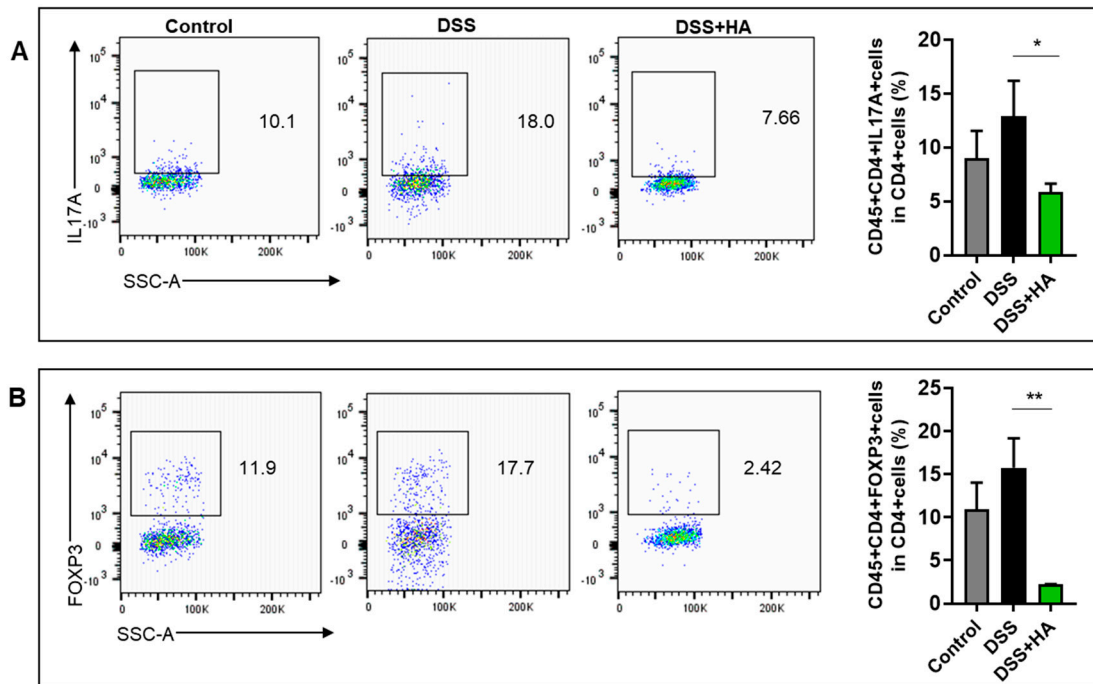

Figure S1. Effects of HA administration on Th17/ Treg cells. (**A** and **B**) The proportion of Th17 (CD45+ CD4+ IL17A+) cells and Treg (CD45+ CD4+FOXP3+) cells. The color of the dots represents the frequency of cell occurrence. Redder represents greater cell density. Data are expressed as mean $\pm$ SE, n = 4–6; \*, P<0.05; \*\*, P<0.01.

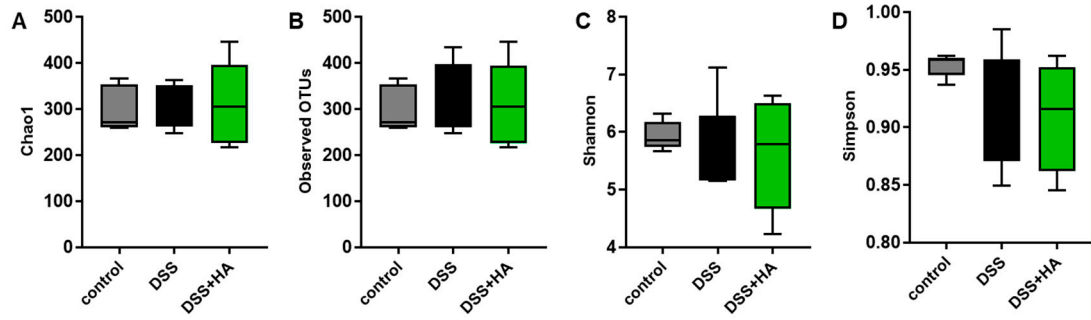

Figure S2. HA intervention demonstrates no significant influence on the  $\alpha$ -diversity of GM. (**A-D**) The  $\alpha$ -diversity analysis of the GM at the OTU level, determined by the Chao1, Observed OTUs, Shannon and Simpson index. Data are expressed as mean  $\pm$  SE, n = 4-5.

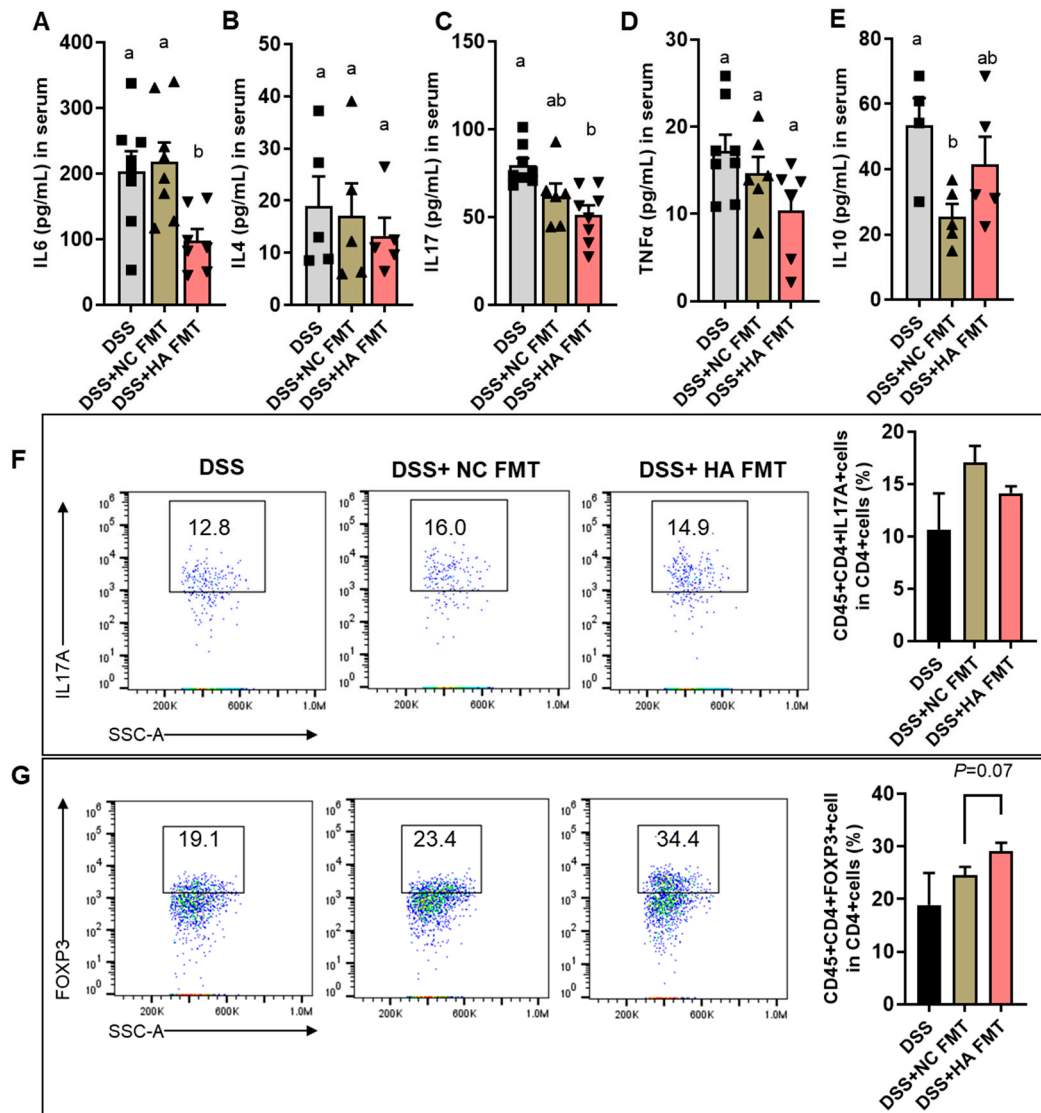

Figure S3. The effects of FMT from colitis mice treated with HA on inflammatory factors and immune cells. **(A–E)** Concentrations of IL4, IL6, TNFα, IL17 and IL10 in serum. **(F and G)** The proportion of Th17 (CD45+ CD4+ IL17A+) cells and Treg (CD45+ CD4+FOXP3+) cells. The color of the dots represents the frequency of cell occurrence. Redder represents greater cell density. Data are expressed as mean±SE, *n* = 4–6, and significant differences (*P*<0.05) are denoted by a, b.
